# Supplementary material for: Diversity, spatial distribution and evolution of inactive and weakly active hydrothermal deposits in the TAG hydrothermal field
Source: Frontiers journal article supplement (doi:10.3389/feart.2024.1304993), 2024-04-02
Supplement: Data_Sheet_2.XLSX [file Data_Sheet_2.XLSX]

## Sheet: Feuil1
XRD analyses on BRUCKER AXS D8 Advance diffractometer
Cu Kα radiation
	40	kV
	30	mA
Scan	start	5°	step	0.01°2θ
	end	70°		1s/step
Minerals identification was done using Diffrac.Suite EVA software and semi-quantitative estimation was performed using TOPAS software.
For amorphous silica estimation:
Using TOPAS software, the +/- 22° (approximate center of the diffuse amorphous scatter) peak was inserted. It corresponds to the "amorphous silica phase"
Peaks for all mineralogical phases identified using Diffrac.Suite EVA software are inserted and correspond to the "crystalline phase"
Simulation of so-called "amorphous silica phase" and "cristalline phase" is done using TOPAS software
Degree of cristallinity was estimated using the "degree of cristallinity" calculator available in TOPAS software
Amorphous silica proportion is : 100 - degree of cristallinity
Assumption is made that opal is the only "amorphous phase" of the sample
Oxide-rich_silica-rich sheet:
The estimation is made among the "cristalline phases"
Different amorphous phases can be present in one sample (e.g. amorphous-XRD Fe and Mn oxyhydroxides, amorphous silica), even in high propotion.
in red: High proportion of amorphous XRD phases = high incertainties of mineral propotions

## Sheet: Sulfides
Results of mineralogical phase estimation (in wt.%)																				Estimation of amorphous				Mineralogical phase proportion including amorphous silica estimations
																				silica (sample > 10wt.% SiO2)
Echantillons	Site	Hydrothermal area	α-sulfur	Pyrite	Marcasite	Chalcopyrite	Sphalerite	Aragonite	Atacamite	Goethite	Quartz	Cristobalite	Halite	Covellite	Mg-Calcite	Calcite	Zincite	Amorphous (position)		Amorphous silica	SiO2 wt.% (XRF)			Echantillons	Site	Hydrothermal area	α-sulfur	Pyrite	Marcasite	Chalcopyrite	Sphalerite	Aragonite	Atacamite	Goethite	Quartz	Cristobalite	Halite	Covellite	Mg-Calcite	Calcite	Zincite	Amorphous silica
HER-DR-09-03	MIR	MIR zone		7	11	82												YES (22° 2θ)		8	21.08			HER-DR-09-03	MIR	MIR zone	0	6.44	10.12	75.44	0	0	0	0	0	0	0	0	0	0	0	8
HER-DR-09-05	MIR	MIR zone		23	20	57															2.46			HER-DR-09-05	MIR	MIR zone	0	23	20	57	0	0	0	0	0	0	0	0	0	0	0	0
HER-DR-09-06	MIR	MIR zone		51		49															3.67			HER-DR-09-06	MIR	MIR zone	0	51	0	49	0	0	0	0	0	0	0	0	0	0	0	0
HER-DR-09-07	MIR	MIR zone		46	48	6															1.2			HER-DR-09-07	MIR	MIR zone	0	46	48	6	0	0	0	0	0	0	0	0	0	0	0	0
HER-PL-20-01	MIR	MIR zone		65.772	28.303	1.496	4.429											YES (22° 2θ)		40	60.84			HER-PL-20-01	MIR	MIR zone	0	39.4632	16.9818	0.8976	2.6574	0	0	0	0	0	0	0	0	0	0	40
HER-PL-20-02	MIR	MIR zone				70			12	18											2.02			HER-PL-20-02	MIR	MIR zone	0	0	0	70	0	0	12	18	0	0	0	0	0	0	0	0
HER-PL-20-03	MIR	MIR zone		84		16															< 0.1			HER-PL-20-03	MIR	MIR zone	0	84	0	16	0	0	0	0	0	0	0	0	0	0	0	0
HER-PL-20-04	MIR	MIR zone		20	44	27	9														3.37			HER-PL-20-04	MIR	MIR zone	0	20	44	27	9	0	0	0	0	0	0	0	0	0	0	0
HER-PL-20-05	MIR	MIR zone		48	23	27	2											YES (22° 2θ)		2	13.14			HER-PL-20-05	MIR	MIR zone	0	47.04	22.54	26.46	1.96	0	0	0	0	0	0	0	0	0	0	2
HER-PL-21-01	MIR	MIR zone		69		31															1.04			HER-PL-21-01	MIR	MIR zone	0	69	0	31	0	0	0	0	0	0	0	0	0	0	0	0
HER-PL-21-02	MIR	MIR zone		82		6			5		7										7.95			HER-PL-21-02	MIR	MIR zone	0	82	0	6	0	0	5	0	7	0	0	0	0	0	0	0
HER-PL-21-04	MIR	MIR zone		20	26	51	2														2.77			HER-PL-21-04	MIR	MIR zone	0	20	26	51	2	0	0	0	0	0	0	0	0	0	0	0
BIC2-PL12-01	MIR	MIR zone		24	35	30	11														4.2			BIC2-PL12-01	MIR	MIR zone	0	24	35	30	11	0	0	0	0	0	0	0	0	0	0	0
BIC2-PL12-02	MIR	MIR zone		13.327	24.736	4.275	56.218						1.444								5.37			BIC2-PL12-02	MIR	MIR zone	0	13.327	24.736	4.275	56.218	0	0	0	0	0	1.444	0	0	0	0	0
BIC2-PL12-03	MIR	MIR zone		15	30	6	48										1				2.33			BIC2-PL12-03	MIR	MIR zone	0	15	30	6	48	0	0	0	0	0	0	0	0	0	1	0
HER2-DR16-01	MIR #3	MIR zone	4	21	14	1	44							16						1	11.05			HER2-DR16-01	MIR #3	MIR zone	3.96	20.79	13.86	0.99	43.56	0	0	0	0	0	0	15.84	0	0	0	1
HER2-DR16-02	MIR #3	MIR zone	11	34	19	8	1				27										31.57			HER2-DR16-02	MIR #3	MIR zone	11	34	19	8	1	0	0	0	27	0	0	0	0	0	0	0
HER2-DR16-03	MIR #3	MIR zone		7	1	15					77										55.82			HER2-DR16-03	MIR #3	MIR zone	0	7	1	15	0	0	0	0	77	0	0	0	0	0	0	0
HER2-DR16-04	MIR #3	MIR zone		7	1	12					81										49.16			HER2-DR16-04	MIR #3	MIR zone	0	7	1	12	0	0	0	0	81	0	0	0	0	0	0	0
HER2-DR16-05	MIR #3	MIR zone		39	2	13	1				45										26.67			HER2-DR16-05	MIR #3	MIR zone	0	39	2	13	1	0	0	0	45	0	0	0	0	0	0	0
HER2-DR16-06	MIR #3	MIR zone		8		8					84										60.69			HER2-DR16-06	MIR #3	MIR zone	0	8	0	8	0	0	0	0	84	0	0	0	0	0	0	0
HER2-DR16-07	MIR #3	MIR zone		6		9					85										70.92			HER2-DR16-07	MIR #3	MIR zone	0	6	0	9	0	0	0	0	85	0	0	0	0	0	0	0
HER-PL-20-06	MIR #7	MIR zone	2	31		2					65										42.16			HER-PL-20-06	MIR #7	MIR zone	2	31	0	2	0	0	0	0	65	0	0	0	0	0	0	0
HER-PL-17-17	Rona Mound	ALVIN Zone		100																	0.35			HER-PL-17-17	Rona Mound	ALVIN Zone	0	100	0	0	0	0	0	0	0	0	0	0	0	0	0	0
HER2-PL21-01	Rona Mound	ALVIN Zone		92			8														0.24			HER2-PL21-01	Rona Mound	ALVIN Zone	0	92	0	0	8	0	0	0	0	0	0	0	0	0	0	0
HER-PL-11-08	Double Mound	ALVIN Zone		99	1																0.58			HER-PL-11-08	Double Mound	ALVIN Zone	0	99	1	0	0	0	0	0	0	0	0	0	0	0	0	0
HER-PL-15-03	Double Mound	ALVIN Zone	2		2	2	69							25							5.29			HER-PL-15-03	Double Mound	ALVIN Zone	2	0	2	2	69	0	0	0	0	0	0	25	0	0	0	0
HER-PL-15-04	Double Mound	ALVIN Zone		94		1			5												0.77			HER-PL-15-04	Double Mound	ALVIN Zone	0	94	0	1	0	0	5	0	0	0	0	0	0	0	0	0
HER-PL-15-05	Double Mound	ALVIN Zone		91	2	5	2														0.3			HER-PL-15-05	Double Mound	ALVIN Zone	0	91	2	5	2	0	0	0	0	0	0	0	0	0	0	0
HER-PL-15-06	Double Mound	ALVIN Zone		99	1																0.66			HER-PL-15-06	Double Mound	ALVIN Zone	0	99	1	0	0	0	0	0	0	0	0	0	0	0	0	0
HER-PL-15-07	Double Mound	ALVIN Zone		98	2																< 0.1			HER-PL-15-07	Double Mound	ALVIN Zone	0	98	2	0	0	0	0	0	0	0	0	0	0	0	0	0
HER-PL-15-14	Double Mound	ALVIN Zone		96	4																0.47			HER-PL-15-14	Double Mound	ALVIN Zone	0	96	4	0	0	0	0	0	0	0	0	0	0	0	0	0
HER-PL-15-15	Double Mound	ALVIN Zone		67.288	26.23	5.054							1.428								0.95			HER-PL-15-15	Double Mound	ALVIN Zone	0	67.288	26.23	5.054	0	0	0	0	0	0	1.428	0	0	0	0	0
HER-PL-17-01a	Southern Mound	ALVIN Zone		27				34	5						31	3					4.28			HER-PL-17-01a	Southern Mound	ALVIN Zone	0	27	0	0	0	34	5	0	0	0	0	0	31	3	0	0
HER-PL-17-03	Southern Mound	ALVIN Zone		99		1															< 0.1			HER-PL-17-03	Southern Mound	ALVIN Zone	0	99	0	1	0	0	0	0	0	0	0	0	0	0	0	0
HER-PL-17-04	Southern Mound	ALVIN Zone		41		2		57													1.34			HER-PL-17-04	Southern Mound	ALVIN Zone	0	41	0	2	0	57	0	0	0	0	0	0	0	0	0	0
HER-PL-17-05A	Southern Mound	ALVIN Zone		100																	1.09			HER-PL-17-05A	Southern Mound	ALVIN Zone	0	100	0	0	0	0	0	0	0	0	0	0	0	0	0	0
HER-PL-17-06	Southern Mound	ALVIN Zone		100																	0.69			HER-PL-17-06	Southern Mound	ALVIN Zone	0	100	0	0	0	0	0	0	0	0	0	0	0	0	0	0
HER-PL-17-07	Southern Mound	ALVIN Zone		90	8		2														0.44			HER-PL-17-07	Southern Mound	ALVIN Zone	0	90	8	0	2	0	0	0	0	0	0	0	0	0	0	0
HER-PL-17-09	Southern Mound	ALVIN Zone		88		12															< 0.1			HER-PL-17-09	Southern Mound	ALVIN Zone	0	88	0	12	0	0	0	0	0	0	0	0	0	0	0	0
HER-PL-17-10	Southern Mound	ALVIN Zone		100																	1.23			HER-PL-17-10	Southern Mound	ALVIN Zone	0	100	0	0	0	0	0	0	0	0	0	0	0	0	0	0
HER-PL-17-11	Southern Mound	ALVIN Zone		100																	0.47			HER-PL-17-11	Southern Mound	ALVIN Zone	0	100	0	0	0	0	0	0	0	0	0	0	0	0	0	0
HER-PL-17-13	Southern Mound	ALVIN Zone		95		5															1.55			HER-PL-17-13	Southern Mound	ALVIN Zone	0	95	0	5	0	0	0	0	0	0	0	0	0	0	0	0
HER-PL-17-14	Southern Mound	ALVIN Zone		95		5												YES (22° 2θ)		8	32.85			HER-PL-17-14	Southern Mound	ALVIN Zone	0	87.4	0	4.6	0	0	0	0	0	0	0	0	0	0	0	8
BIC-DR-02-01	Shinkai Mound	ALVIN Zone	4	25	23		1				4	43									33.51			BIC-DR-02-01	Shinkai Mound	ALVIN Zone	4	25	23	0	1	0	0	0	4	43	0	0	0	0	0	0
BIC-DR-02-06	Shinkai Mound	ALVIN Zone		20	13						25	42									60.96			BIC-DR-02-06	Shinkai Mound	ALVIN Zone	0	20	13	0	0	0	0	0	25	42	0	0	0	0	0	0
HER-PL-14-03	Shinkai Mound	ALVIN Zone		97		3															1.72			HER-PL-14-03	Shinkai Mound	ALVIN Zone	0	97	0	3	0	0	0	0	0	0	0	0	0	0	0	0
HER-PL-14-04	Shinkai Mound	ALVIN Zone	2.985	91.812	3.59		1.613											YES (22° 2θ)		62	57.53			HER-PL-14-04	Shinkai Mound	ALVIN Zone	1.1343	34.8886	1.3642	0	0.61294	0	0	0	0	0	0	0	0	0	0	62
HER-PL-14-06	Shinkai Mound	ALVIN Zone	1.716	42.693	21.675	32.714	1.202											YES (22° 2θ)		12	23.89			HER-PL-14-06	Shinkai Mound	ALVIN Zone	1.51008	37.5698	19.074	28.7883	1.05776	0	0	0	0	0	0	0	0	0	0	12
HER-PL-14-08	Shinkai Mound	ALVIN Zone		80	18		1				1							YES (22° 2θ)		50	45.65			HER-PL-14-08	Shinkai Mound	ALVIN Zone	0	40	9	0	0.5	0	0	0	0.5	0	0	0	0	0	0	50
HER-PL-14-09	Shinkai Mound	ALVIN Zone		32	67		1														4.56			HER-PL-14-09	Shinkai Mound	ALVIN Zone	0	32	67	0	1	0	0	0	0	0	0	0	0	0	0	0
HER-PL-14-10-tot	Shinkai Mound	ALVIN Zone	5	65	28		2											YES (22° 2θ)		30	27.52			HER-PL-14-10-tot	Shinkai Mound	ALVIN Zone	3.5	45.5	19.6	0	1.4	0	0	0	0	0	0	0	0	0	0	30
HER-PL-14-11	Shinkai Mound	ALVIN Zone		52.722	46.616		0.662														4.47			HER-PL-14-11	Shinkai Mound	ALVIN Zone	0	52.722	46.616	0	0.662	0	0	0	0	0	0	0	0	0	0	0
HER-PL-14-12	Shinkai Mound	ALVIN Zone		97		3															2.67			HER-PL-14-12	Shinkai Mound	ALVIN Zone	0	97	0	3	0	0	0	0	0	0	0	0	0	0	0	0
HER2-PL21-PBT01	Shinkai Mound	ALVIN Zone		96			4														0.21			HER2-PL21-PBT01	Shinkai Mound	ALVIN Zone	0	96	0	0	4	0	0	0	0	0	0	0	0	0	0	0
HER-PL-14-02	New Mound 2	ALVIN Zone		15	36		22	9	18												4.48			HER-PL-14-02	New Mound 2	ALVIN Zone	0	15	36	0	22	9	18	0	0	0	0	0	0	0	0	0
HER-PL-15-13	New Mound 2	ALVIN Zone		76	24													YES (22° 2θ)		11	37.71			HER-PL-15-13	New Mound 2	ALVIN Zone	0	67.64	21.36	0	0	0	0	0	0	0	0	0	0	0	0	11
HER-PL-14-01	New Mound 3	ALVIN Zone		100																	0.66			HER-PL-14-01	New Mound 3	ALVIN Zone	0	100	0	0	0	0	0	0	0	0	0	0	0	0	0	0
HER-PL-14-05	New Mound 3	ALVIN Zone		67	33													YES (22° 2θ)		41	40.32			HER-PL-14-05	New Mound 3	ALVIN Zone	0	39.53	19.47	0	0	0	0	0	0	0	0	0	0	0	0	41
HER-PL-15-09	New Mound 3	ALVIN Zone		89	8		3														1.51			HER-PL-15-09	New Mound 3	ALVIN Zone	0	89	8	0	3	0	0	0	0	0	0	0	0	0	0	0
HER-PL-11-06b	Mont de Reliques	ALVIN Zone		44		2		48	6												1.34			HER-PL-11-06b	Mont de Reliques	ALVIN Zone	0	44	0	2	0	48	6	0	0	0	0	0	0	0	0	0
HER-PL-14-13	Mont de Reliques	ALVIN Zone		40.702	28.928	0.764		29.571													2.47			HER-PL-14-13	Mont de Reliques	ALVIN Zone	0	40.702	28.928	0.764	0	29.571	0	0	0	0	0	0	0	0	0	0
HER-PL-11-02	Cyana (#29)	ALVIN Zone	13	30	57													YES (22° 2θ)		26	36.1			HER-PL-11-02	Cyana (#29)	ALVIN Zone	9.62	22.2	42.18	0	0	0	0	0	0	0	0	0	0	0	0	26
HER-PL-11-03	Cyana (#29)	ALVIN Zone		92	8													YES (22° 2θ)		15	28.61			HER-PL-11-03	Cyana (#29)	ALVIN Zone	0	78.2	6.8	0	0	0	0	0	0	0	0	0	0	0	0	15
HER-PL-18-01	Shimmering	Shimmering Zone		86		14															3.59			HER-PL-18-01	Shimmering	Shimmering Zone	0	86	0	14	0	0	0	0	0	0	0	0	0	0	0	0
HER-PL-18-02	Shimmering	Shimmering Zone		87		13															3.12			HER-PL-18-02	Shimmering	Shimmering Zone	0	87	0	13	0	0	0	0	0	0	0	0	0	0	0	0
	Silica phases	SiO2 wt.%
	estimation
HER-DR-09-03	8	21.08
HER-PL-20-01	40	60.84
HER-PL-20-05	2	13.14
HER2-DR16-01	1	11.05
HER2-DR16-02	27	31.57
HER2-DR16-03	77	55.82
HER2-DR16-04	81	49.16
HER2-DR16-05	45	26.67
HER2-DR16-06	84	60.69
HER2-DR16-07	85	70.92
HER-PL-20-06	65	42.16
HER-PL-17-14	8	32.85
BIC-DR-02-01	47	33.51
BIC-DR-02-06	67	60.96
HER-PL-14-04	62	57.53
HER-PL-14-06	12	23.89
HER-PL-14-08	51	45.65
HER-PL-14-10-tot	30	27.52
HER-PL-15-13	11	37.71
HER-PL-14-05	41	40.32
HER-PL-11-02	26	36.1
HER-PL-11-03	15	28.61

## Sheet: Oxide-rich_silica-rich
Fe-Mn-Si LT mineralization and silica-iron mineralization (with <5 wt.% sulfides)
Sample name	Site	Hydrothermal zone	Goethite	Hematite	Todorokite	Birnessite	Quartz	Cristobalite	Calcite	Mg-Calcite	Pyrite	Marcasite	Chalcopyrite	Sphalerite	α-sulfur	Jarosite	Chalcanthite	Nontronite	Chlorite	Clays	Plagioclases	Halite	Nature
HER-PL-13-01	#11	West TAG active mound	40.178			54.373			2.161													3.288	LT Fe-Mn precipitates
HER-PL-13-02	#11	West TAG active mound			13.003	27.359													59.638				LT Fe-Mn precipitates
HER-PL-21-03	MIR	MIR zone		12			85				3												Si-Fe mineralization	strongly oxidized
HER-PL-21-06	MIR	MIR zone	75.129	24.871																			LT Fe precipitates
HER2-PL22-PBT01	MIR	MIR zone	Amorphous phases and halite																				LT Fe-Si-Mn precipitates (active)
HER-PL-21-11	MIR #3	MIR zone				95.486	1.767															2.746	LT Mn-Fe precipitates
HER2-DR16-08	MIR #3	MIR zone					95				4		1	<1									Si-Fe mineralization (wt sulfides)	in part oxidized
HER2-DR16-09	MIR #3	MIR zone					96				3		<1	1									Si-Fe mineralization (wt sulfides)	in part oxidized
HER2-DR16-10	MIR #3	MIR zone	Amorphous phases																				LT Mn-Fe precipitates
HER2-DR16-11	MIR #3	MIR zone			95		5																LT Mn-Fe precipitates
HER2-DR16-12	MIR #3	MIR zone			99		<1																LT Mn-Fe precipitates
HER2-DR16-23	MIR #3	MIR zone			60	40																	LT Mn-Fe precipitates
BIC2-PL12-04	MIR #7	MIR zone	Amorphous phases and halite and gypsum																				LT Si-Fe mineralization
HER2-PL16-06	Menez Du	NAUTILE Zone				78			19													3	LT Mn precipitates
HER2-PL22-02	Menez Du	NAUTILE Zone				99																1	LT Mn precipitates
HER2-PL16-04	Menez Du #2	NAUTILE Zone	100																				LT Fe-Mn precipitates
HER2-PL16-05	Menez Du #2	NAUTILE Zone	Amorphous phases																				LT Fe precipitates
HER2-PL22-01	Menez Du #3	NAUTILE Zone				98																2	LT Mn precipitates
HER-PL-11-09	Abyss	NAUTILE Zone	82	18																			Nearly fully-oxidized sulfide breccia
HER-PL-11-10	Abyss	NAUTILE Zone	46.895	16.924															29.031			7.149	Metalliferous sediments
HER-PL-11-11	Abyss	NAUTILE Zone	99.202																			0.798	LT Fe precipitates
HER-PL-11-12	Abyss	NAUTILE Zone	64.925	25.66			8.57															0.844	LT Fe precipitates
HER2-PL16-01	Abyss	NAUTILE Zone	61	37																		2	LT Fe precipitates
HER2-PL16-02	Abyss	NAUTILE Zone	90	10																			LT Fe precipitates
HER2-PL16-03	Abyss	NAUTILE Zone	90	10																			LT Fe precipitates
HER2-PL22-04	Abyss	NAUTILE Zone	69	31																			LT Fe precipitates
HER-PL-15-01-02	Double Mound	ALVIN Zone	72.402				1.002		23.231													3.365	Metalliferous sediments
HER-PL-15-17	Double Mound	ALVIN Zone	80.822															17.138				2.04	LT Fe precipitates
HER-PL-15-18	Double Mound	ALVIN Zone	48.296																	46.369		5.334	Metalliferous sediments
HER-PL-17-01b	Southern Mound	ALVIN Zone	43.403						18.692	37.905													Metalliferous sediments
HER-PL-17-02	Southern Mound	ALVIN Zone	80.515						1.613	17.872													Metalliferous sediments
HER-PL-17-12	Southern Mound	ALVIN Zone	100																				Metalliferous sediments
HER-PL-17-15	Southern Mound	ALVIN Zone	100																				Metalliferous sediments
BIC-DR-02-02	Shinkai Mound	ALVIN Zone									33	17								2		48	Si-Fe mineralization (wt sulfides)	in part oxidized
BIC-DR-02-03	Shinkai Mound	ALVIN Zone					21	50			16	7			6								Si-Fe mineralization (wt sulfides)
BIC-DR-02-04	Shinkai Mound	ALVIN Zone	88								<1					11						1	Si-Fe mineralization
BIC-DR-02-05	Shinkai Mound	ALVIN Zone	100																				Metalliferous sediments
HER-PL-14-07	Shinkai Mound	ALVIN Zone	100																			<5	Metalliferous sediments
HER-PL-11-06a	Monts de Reliques	ALVIN Zone	37.155		16.673	46.172																	Metalliferous sediments
HER-PL-11-01	Cyana (#29)	ALVIN Zone				96.089			2.119													1.792	LT Mn-Fe precipitates
HER-PL-18-03	Shimmering	Shimmering Zone	20.838	79.162																			LT Fe precipitates
HER-PL-18-04	Shimmering #2	Shimmering Zone	Amorphous phases																				LT Fe-Mn precipitates
HER-PL-18-05	Shimmering #2	Shimmering Zone	100																				LT Fe precipitates
HER-PL-18-06	Shimmering #2	Shimmering Zone		8.224			91.5																Metalliferous sediments
HER-PL-18-07	Shimmering #2	Shimmering Zone							100														Metalliferous sediments
HER2-PL20-03	Shimmering #2	Shimmering Zone	Amorphous phases																				LT Fe-Mn precipitates
HER-PL-18-08	Shimmering #3	Shimmering Zone	87.766				12.234																LT Fe precipitates
HER-PL-18-09	Shimmering #3	Shimmering Zone	84.583	13.944																		1.473	LT Fe precipitates
HER2-PL20-01	Shimmering #3	Shimmering Zone	99																			1	LT Fe precipitates
HER2-PL20-02	Shimmering #3	Shimmering Zone		33			65															2	Si-Fe mineralization
HER2-PL20-04	Shimmering #4	Shimmering Zone	100																				Metalliferous sediments
HER2-PL20-05	Shimmering #4	Shimmering Zone		35			64															1	Si-Fe mineralization
HER2-PL20-06	Shimmering #4	Shimmering Zone	8				91															1	Si-Fe mineralization
HER2-PL20-07	Shimmering #4	Shimmering Zone	18				80															1	Si-Fe mineralization
HER2-PL20-08a	Shimmering #4	Shimmering Zone	4				92				4												Si-Fe mineralization (wt sulfides)	in part oxidized

## Sheet: Charts
																			Mean - only major phases
Hydrothermal	α-sulfur	Pyrite	Marcasite	Chalcopyrite	Sphalerite	Aragonite	Atacamite	Goethite	Quartz	Cristobalite	Halite	Covellite	Mg-Calcite	Calcite	Zincite	Amorphous			Hydrothermal	Pyrite	Marcasite	Chalcopyrite	Sphalerite	Silica
Area																Silica			MIR Zone	31.0823	14.0929	23.5031	7.91097	23.4106
MIR	0	36.018	18.4919	30.4048	8.72236	0	1.13333	1.2	0.466667	0	0.0962667	0	0	0	0.0666667	3.33333			Alvin Zone	74.5531	10.7094	1.97589	3.05377	9.70784
Stdv	0	26.616	16.5238	24.8547	18.0083	0	3.27036	4.64758	1.80739	0	0.372839	0	0	0	0.258199	10.3556			MIR	36.9654	18.9783	31.2046	8.95179	3.89995
MIR#3	2.13714	17.3986	5.26571	9.42714	6.50857	0	0	0	57	0	0	2.26286	0	0	0	0.142857			Double	84.0479	4.98714	1.70291	9.26201	0
Stdv	4.17752	14.0727	7.79963	4.58045	16.3449	0	0	0	33.6204	0	0	5.98696	0	0	0	0.377964			Southern	95.6082	0.824742	2.53608	0.206186	0.824742
MIR Total	0.737391	30.1331	13.6625	22.7853	7.66937	0	0.73913	0.782609	20.4783	0	0.0627826	0.688696	0	0	0.0434783	2.21739			Shinkai	53.0052	18.2276	3.19201	0.938904	24.6363
Stdv	2.41374	24.0845	15.4	22.6901	16.8253	0	2.66658	3.75326	33.1345	0	0.301095	3.30287	0	0	0.208514	8.40972
Rona	0	96	0	0	4	0	0	0	0	0	0	0	0	0	0	0
Stdv	0	5.65685	0	0	5.65685	0	0	0	0	0	0	0	0	0	0	0
Double Mound	0.25	80.536	4.77875	1.63175	8.875	0	0.625	0	0	0	0.1785	3.125	0	0	0	0
Stdv	0.707107	34.1808	8.74497	2.21172	24.3042	0	1.76777	0	0	0	0.504874	8.83883	0	0	0	0
Southern Mound	0	84.3091	0.727273	2.23636	0.181818	8.27273	0.454545	0	0	0	0	0	2.81818	0.272727	0	0.727273
Stdv	0	25.5549	2.41209	3.7436	0.603023	19.1107	1.50756	0	0	0	0	0	9.34685	0.904534	0	2.41209
Shinkaï Mound	0.922216	52.5164	18.0595	3.16257	0.930245	0	0	0	2.68182	7.72727	0	0	0	0	0	14
Stdv	1.49872	29.705	21.4553	8.5834	1.12356	0	0	0	7.49758	17.1936	0	0	0	0	0	22.8736
New Mound 2	0	41.32	28.68	0	11	4.5	9	0	0	0	0	0	0	0	0	5.5
Stdv	0	37.2221	10.352	0	15.5563	6.36396	12.7279	0	0	0	0	0	0	0	0	7.77817
New Mound 3	0	76.1767	9.15667	0	1	0	0	0	0	0	0	0	0	0	0	13.6667
Stdv	0	32.21	9.7864	0	1.73205	0	0	0	0	0	0	0	0	0	0	23.6714
Mont de Reliques	0	42.351	14.464	1.382	0	38.7855	3	0	0	0	0	0	0	0	0	0
Stdv	0	2.33204	20.4552	0.873984	0	13.0313	4.24264	0	0	0	0	0	0	0	0	0
Cyana	4.81	50.2	24.49	0	0	0	0	0	0	0	0	0	0	0	0	20.5
Stdv	6.80237	39.598	25.0174	0	0	0	0	0	0	0	0	0	0	0	0	7.77817
ALVIN Total	0.530839	69.2107	9.942	1.8343	2.83494	4.331	0.829268	0	0.719512	2.07317	0.0348293	0.609756	0.756098	0.0731707	0	6.21951
Stdv	1.70886	31.8199	15.6348	4.90944	11.2011	13.1295	3.08952	0	3.93708	9.26928	0.223016	3.90434	4.84139	0.468521	0	14.6364
Shimmering	0	86.5	0	13.5	0	0	0	0	0	0	0	0	0	0	0	0
Stdv	0	0.707107	0	0.707107	0	0	0	0	0	0	0	0	0	0	0	0
